# Supplementary material
Source: Springer Nature journal article supplement (https://www.springermedizin.de/resource/supplementary/12986_2012_499_MOESM1_ESM.pdf/25656150)

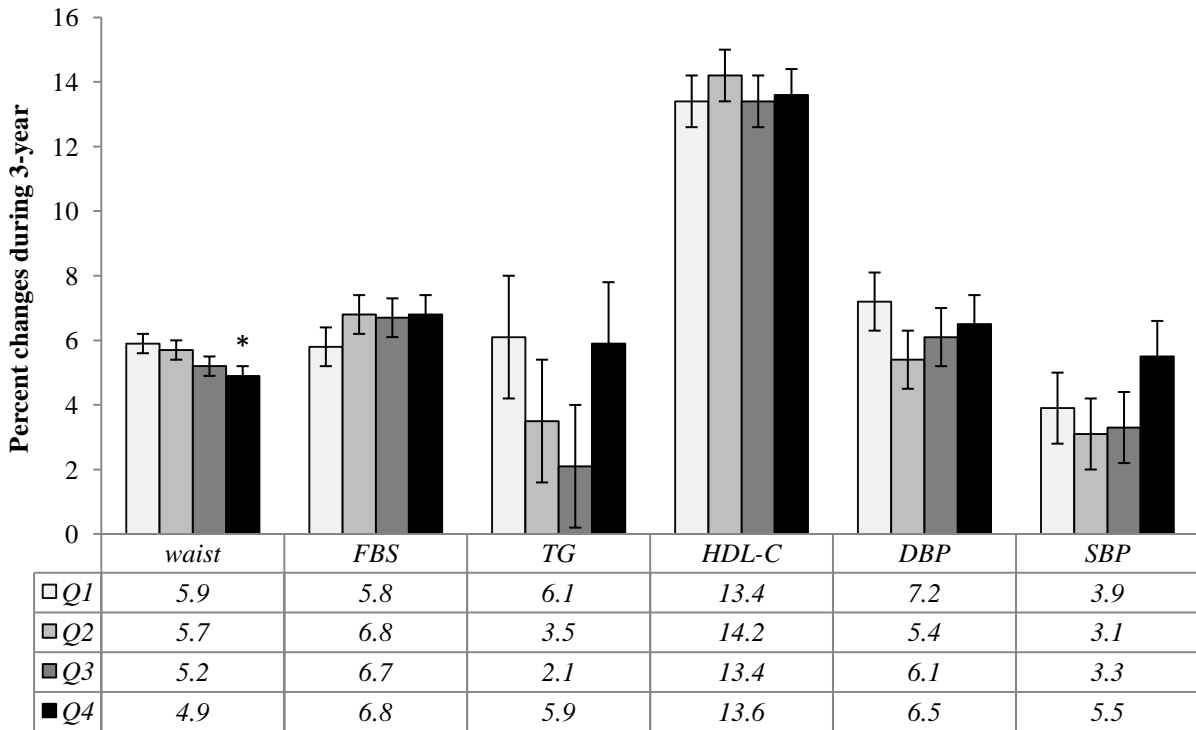

Supplement: MOESM1 [file 25656150]
